# Supplementary material for: Burden, trends, and risk factors of esophageal cancer in China from 1990 to 2017: an up-to-date overview and comparison with those in Japan and South Korea
Source: Springer Nature journal article supplement (doi:10.1186/s13045-020-00981-4), 2020-11-02
Supplement: MOESM2 [file 18546862]

**All: 4 Joinpoints**

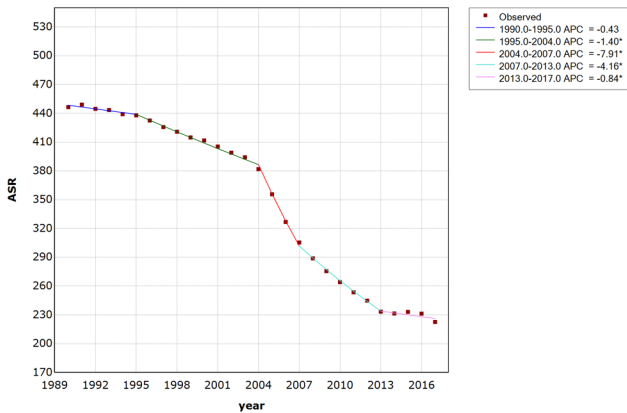

\* Indicates that the Annual Percent Change (APC) is significantly different from zero at the alpha = 0.05 level.  
 Final Selected Model: 4 Joinpoints.

**All: 4 Joinpoints**

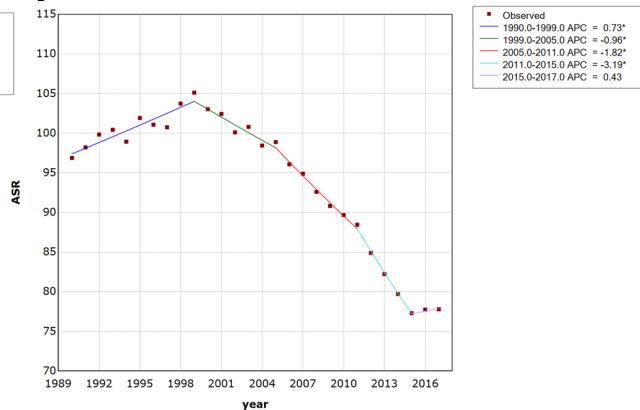

\* Indicates that the Annual Percent Change (APC) is significantly different from zero at the alpha = 0.05 level.  
 Final Selected Model: 4 Joinpoints.

**All: 3 Joinpoints**

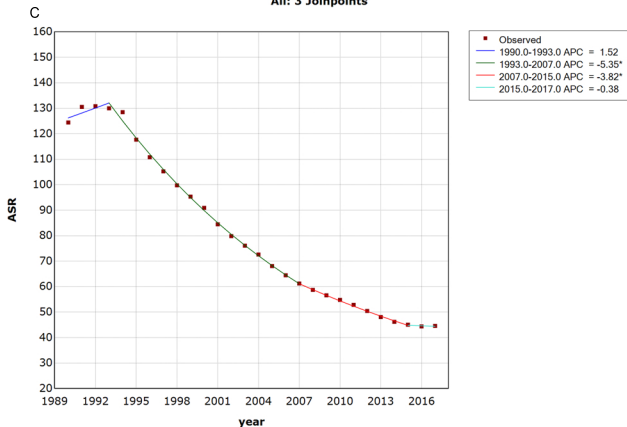

\* Indicates that the Annual Percent Change (APC) is significantly different from zero at the alpha = 0.05 level.  
 Final Selected Model: 3 Joinpoints.

**All: 4 Joinpoints**

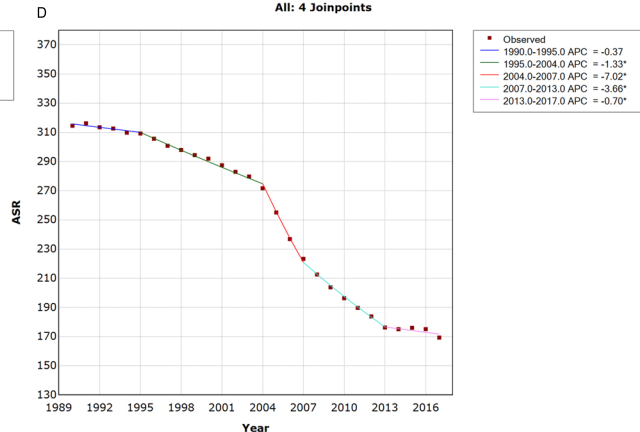

\* Indicates that the Annual Percent Change (APC) is significantly different from zero at the alpha = 0.05 level.  
 Final Selected Model: 4 Joinpoints.

**All: 4 Joinpoints**

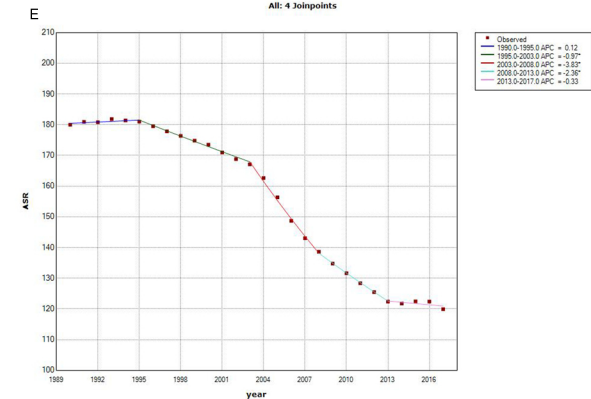

\* Indicates that the Annual Percent Change (APC) is significantly different from zero at the alpha = 0.05 level.  
 Final Selected Model: 4 Joinpoints.
