# Supplementary material for: Burden, trends, and risk factors of esophageal cancer in China from 1990 to 2017: an up-to-date overview and comparison with those in Japan and South Korea
Source: Springer Nature journal article supplement (doi:10.1186/s13045-020-00981-4), 2020-11-02

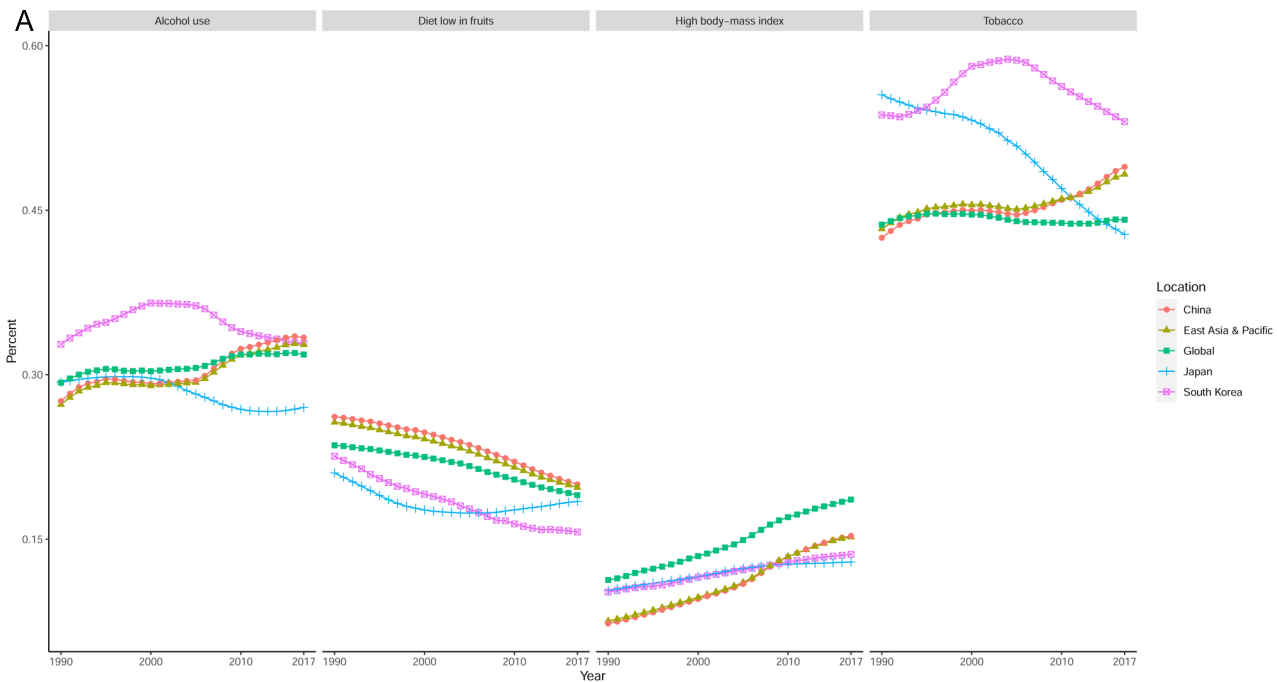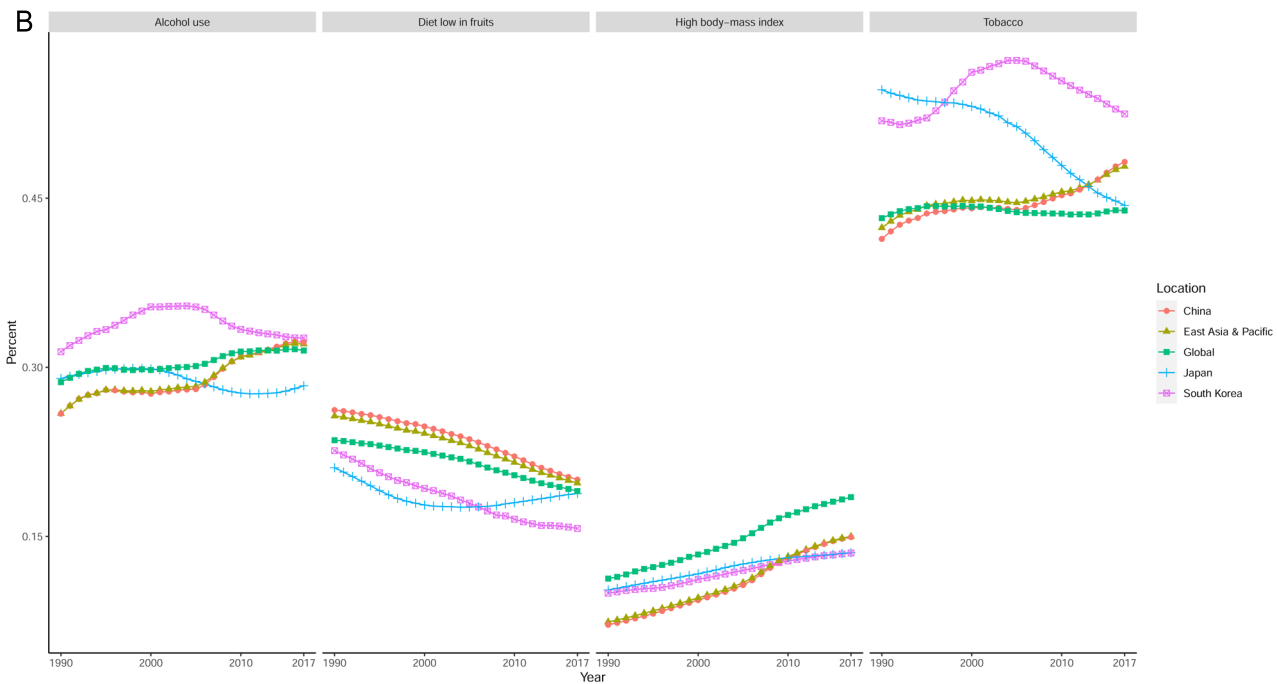

Supplement: MOESM3 [file 18546862]
